# Supplementary material for: Predictors of interstitial lung disease in early systemic sclerosis: a prospective longitudinal study of the GENISOS cohort
Source: Springer Nature journal article supplement (doi:10.1186/ar3125), 2010-09-02
Supplement: Additional file 1 [file ar3125-s1.doc]

Supplement 1:

Scoring System for Annual Household Income:

1 = < $5,000

2= $5,000 - 9,999

3=$ 10,000 - 14,999

4= $15,000 - 19,999

5= $ 20,000 - 29,999

6 = $ 30,000 - 49,999

7 = $ 50,000 - 99,999

8 = >=$ 100,000

Scoring System for Educational Level:

Less than High School Graduate 0

High School Diploma or Equivalent1

Associate Degree 2

Bachelor’s Degree3

Master’s Degree 4

Doctorate 5

Professional (MD, JD, DDS, etc.)  6

Supplement 2:

Table 1: Baseline clinical characteristics of patients enrolled in the GENISOS*

| Characteristics |  |
| --- | --- |
| MRSS , mean, SD | 15.8 (11.75) |
| Disease duration (alternative method) †, mean, SD | 4.68 (0.16) |
| Visual analogue score for dyspnea, median | 1.3 |
| Visual analogue score for pain, median | 4.05 |
| Telenagiectasia  Facial/oral  Palmar |  |
| 118 (44.36) |
| 81 (30.45) |
| Dysphagia, n, % | 131 (49.25) |
| PAH by echocardiogram‡, n, % | 16 (23.9) |
| Crackles on physical examination, n, % | 63 (23.68) |
| Pulmonary fibrosis on CXR, n, % | 49 (18.42) |
| FVC % predicted, mean, SD | 84.15 (22.16) |
| FEV1% predicted, mean, SD | 81.87 (20.68) |
| DLco% predicted, mean, SD | 70.72 (23.28) |
| TLC% predicted , mean, SD | 91.26 (20.94) |
| Creatinine ≥ 1.5,n, % | 7 (2.63) |
| CPK>200, n, % | 39 (14.67) |
| Hematocrit, mean, SD | 38.2 (4.39) |
| White Blood Cell Count, mean, SD | 7.6 (2.81) |
| Platelet Count, mean, SD | 286.37 (93.65) |
| Medsger Severity Index |  |
| General, mean, SD | 0.46 (0.81) |
| Peripheral vascular, mean, SD | 1.53 (1.1) |
| Skin, mean, SD | 1.57(0.83) |
| Joint/tendon, mean, SD | 0.7(1.23) |
| Muscle, mean, SD | 0.21(0.42) |
| GI Tract, mean, SD | 0.7(0.64) |
| Lung, mean, SD | 1.34(1.12) |
| Heart, mean, SD | 0.27(0.73) |
| Kidney, mean, SD | 0.09(0.44) |

*MRSS= Modified Rodnan Skin Score; COPD= Chronic obstructive pulmonary disease; PAH= Pulmonary Arterial Hypertension; FVC= Forced vital capacity; FEV1=Forced expiratory volume in 1 second; DLco= lung diffusion capacity for Carbon monoxide; TLC= Total lung capacity; CPK= Creatine Phosphokinase.

†Disease onset defined as first symptom attributable to SSc

‡Baseline echocardiogram results were available in 63 patients
